# Supplementary material for: Circrhbdd1 Augments M6a-Dependent Metabolic Reprogramming and Restricts Anti-PD-1 Therapy in Hepatocellular Carcinoma
Source: Research Square preprint supplement (doi:10.21203/rs.3.rs-425094/v1), 2021-05-07
Supplement: Supplementary file 1 [file 1efc614e8fa3b1d6fd746ebd.docx]

**Table S2: Clinicopathological variables and circRHBDD1 expression level in HCC samples (*n* = 96)**

| Variables |  | circRHBDD1 expression level | | *P* value |
| --- | --- | --- | --- | --- |
| Low | High |
| Age at surgery | ≤60 years | 27 | 31 | 0.404 |
|  | >60 years | 21 | 17 |  |
| Gender | Female | 12 | 16 | 0.369 |
|  | Male | 36 | 32 |  |
| Tumor number | Single | 34 | 22 | **0.013** |
|  | Multiple | 14 | 26 |  |
| Microvascular invasion | Negative | 28 | 13 | **0.002** |
|  | Positive | 20 | 35 |  |
| Edmondson stage | I-II | 29 | 21 | 0.102 |
|  | III-IV | 19 | 27 |  |
| Tumor size | ≤5 cm | 35 | 22 | **0.007** |
|  | >5 cm | 13 | 26 |  |
| Tumor capsule | Negative | 18 | 24 | 0.217 |
|  | Positive | 30 | 24 |  |
| Cirrhosis | Negative | 23 | 18 | 0.108 |
|  | Positive | 25 | 30 |  |
| AFP | ≤500 ng/mL | 33 | 21 | **0.014** |
|  | >500 ng/mL | 15 | 27 |  |
| HBsAg | Negative | 19 | 15 | 0.393 |
|  | Positive | 29 | 33 |  |
| TNM stage | I-II | 27 | 11 | **0.001** |
|  | III-IV | 21 | 37 |  |

AFP: α-fetoprotein; TNM: Tumor-node-metastasis.

The bold number means statistically significant.
