# Supplementary material for: Circrhbdd1 Augments M6a-Dependent Metabolic Reprogramming and Restricts Anti-PD-1 Therapy in Hepatocellular Carcinoma
Source: Research Square preprint supplement (doi:10.21203/rs.3.rs-425094/v1), 2021-05-07
Supplement: Supplementary file 3 [file 64c1cac12d61046b749ac62e.docx]

| Genes | Forward primer | Reverse primer |
| --- | --- | --- |
| hsa_circ_0058497 | CCAGGAACTATGACACGTACACAG | AGCGAAGGAAGTCCTCGGT |
| hsa_circ_0001361 | TCAGTGCATTCAAGGAAGCC | CCATCCTCTGCTCTTATTGTGAA |
| hsa_circ_0091581 | TGGAGAACGTACTGCTTGGTC | TGGAGTCAGGCTTGGGTAGT |
| hsa_circ_0084615 | TCAGAGGTGCTTCAAGGAAAA | GCCTTTCCTCCCATTCTTGT |
| hsa_circ_0073128 | CTGAAACTGAAGGAAGAGGAAA | TGTGTTTGGGTCAATTTGGA |
| RHBDD1 | CTCTGGGACCGAGGAAATACC | ACCTCACTGGCTATCGAATCTGT |
| GLUT1 | GGCCAAGAGTGTGCTAAAGAA | ACAGCGTTGATGCCAGACAG |
| HK2 | GAGCCACCACTCACCCTACT | CCAGGCATTCGGCAATGTG |
| ASCT2 | TGGTCTCCTGGATCATGTGG | TTTGCGGGTGAAGAGGAAGT |
| GLS1 | TGGTGGCCTCAGGTGAAAAT | CCAAGCTAGGTAACAGACCCTGTTT |
| GAPDH | AATCCCATCACCATCTTCC | CATCACGCCACAGTTTCC |
| U6 | AACGCTTCACGAATTTGCGT | CTCGCT TCGGCAGCACA |
| PIK3R1 | CAGCAACCTGGCAGAATTACGA | TGACAGGATTTGGTAAGTCCAGGAG |
| YTHDF1 | ATGTCGGCCACCAGCGTGGACA | TCATTGTTTGTTTCGACTCTGC |
| EIF4A3 | GATGCCGATGAACGTTGCTG | GGTGGTGGCACCTTAGAAGTAT |

**Table S1: Primers used for RT-qPCR in this study**
